# Supplementary material for: Impact of the COVID-19 Pandemic and Public Restrictions on Outcomes After Catheter Ablation of Atrial Fibrillation
Source: Frontiers journal article supplement (doi:10.3389/fcvm.2022.836288), 2022-03-24
Supplement: Data_Sheet_1.PDF [file Data_Sheet_1.PDF]

**Supplemental Figure 1.** (A) Number of COVID-19 cases in Korea, (B) study inclusion criteria and follow-up periods, and (C) flowchart of the study.

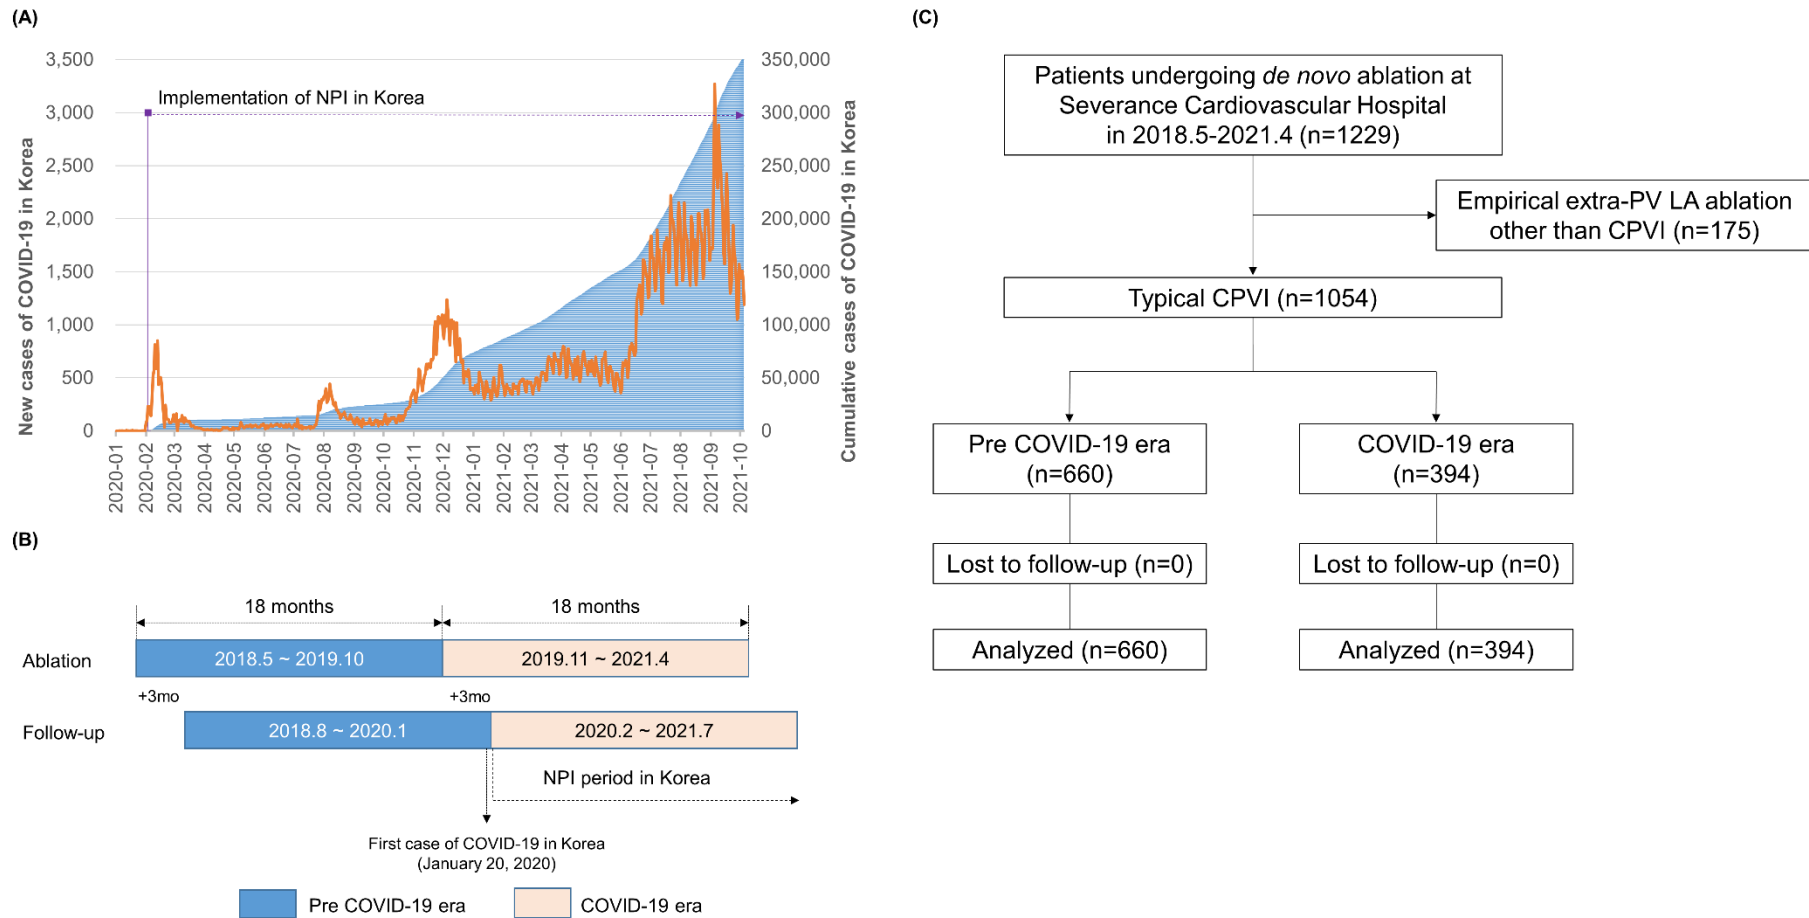

AF, atrial fibrillation; COVID-19, coronavirus disease 2019; CPVI, circumferential pulmonary vein isolation; NPI, nonpharmaceutical intervention; PV, pulmonary vein.
